# Supplementary material for: Probing the Suitability of Different Ca2+ Parameters for Long Simulations of Diisopropyl Fluorophosphatase
Source: MDPI journal article supplement (doi:10.3390/molecules26195839), 2021-09-26
Supplement: s1 [file s1]

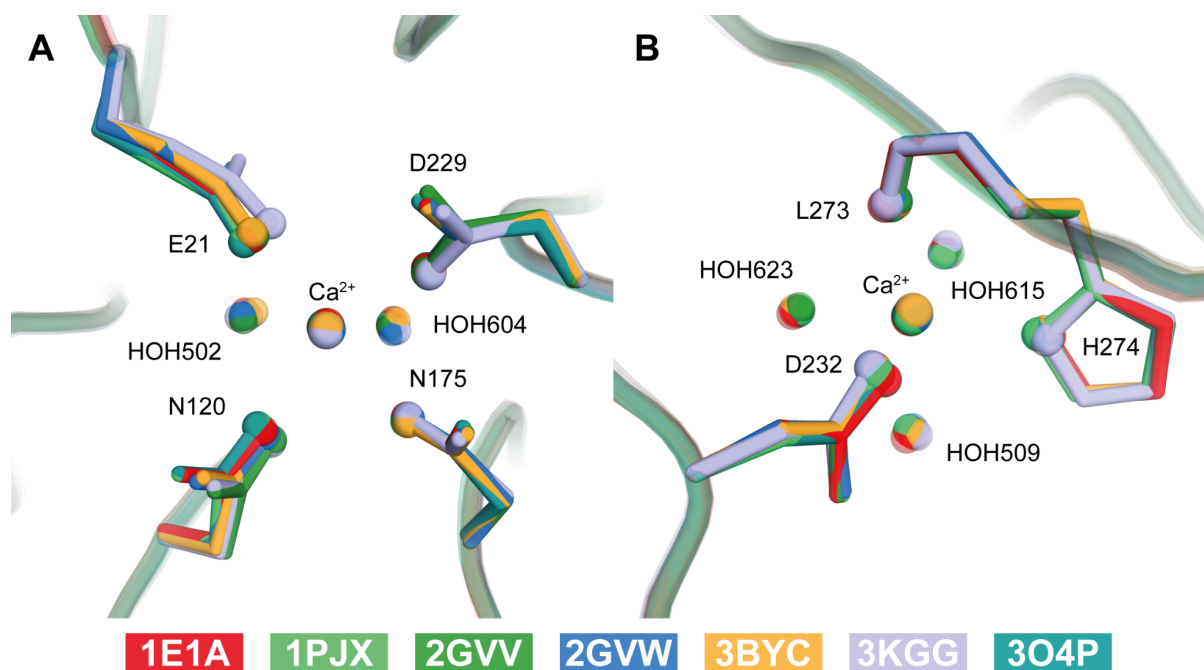

Figure S1. Low variability in the structure of calcium-binding sites of wild-type DFPase in X-ray structures. Water molecules are numbered according to 3O4P.

Table S1. Individual distance measurements demonstrate low variability in the conformation of the catalytic calcium binding site of wild-type DFPase in X-ray structures. Atoms used to calculate distances are shown as spheres in Figure S1. Distances are in angstroms.

| PDB ID | E21       | D229      | N120      | N175      | HOH502    | HOH604    |
|--------|-----------|-----------|-----------|-----------|-----------|-----------|
| 1E1A   | 2.34      | 2.35      | 2.38      | 2.34      | 2.62      | 2.40      |
| 1PJX   | 2.35      | 2.36      | 2.33      | 2.40      | 2.48      | 2.35      |
| 2GVV   | 2.36      | 2.36      | 2.44      | 2.36      | 2.48      | 2.36      |
| 2GVW   | 2.37      | 2.32      | 2.42      | 2.34      | 2.49      | 2.33      |
| 3BYC   | 2.42      | 2.37      | 2.45      | 2.39      | 2.50      | 2.43      |
| 3KGG   | 2.35      | 2.42      | 2.49      | 2.30      | 2.64      | 2.44      |
| 3O4P   | 2.35      | 2.36      | 2.33      | 2.40      | 2.47      | 2.35      |
|        | 2.36±0.02 | 2.36±0.03 | 2.41±0.06 | 2.36±0.03 | 2.53±0.07 | 2.38±0.04 |

Table S2. Individual distance measurements demonstrate low variability in the conformation of the structural calcium binding site of wild-type DFPase in X-ray structures. Atoms used to calculate distances are shown as spheres in Figure S1. Distances are in angstroms.

| PDB ID | D232      | L273      | H274      | HOH509    | HOH615    | HOH623    |
|--------|-----------|-----------|-----------|-----------|-----------|-----------|
| 1E1A   | 2.22      | 2.34      | 2.56      | 2.41      | 2.28      | 2.35      |
| 1PJX   | 2.21      | 2.26      | 2.36      | 2.30      | 2.25      | 2.25      |
| 2GVV   | 2.20      | 2.34      | 2.52      | 2.36      | 2.32      | 2.23      |
| 2GVW   | 2.16      | 2.32      | 2.45      | 2.36      | 2.30      | 2.32      |
| 3BYC   | 2.16      | 2.23      | 2.43      | 2.42      | 2.43      | 2.38      |
| 3KGG   | 2.23      | 2.35      | 2.51      | 2.42      | 2.33      | 2.35      |
| 3O4P   | 2.21      | 2.26      | 2.37      | 2.30      | 2.25      | 2.25      |
|        | 2.20±0.03 | 2.30±0.05 | 2.46±0.07 | 2.37±0.05 | 2.31±0.06 | 2.30±0.06 |

Table S3. Single-site nonbonded metal parameters, Gromacs notation. For all, the mass is 40.08 au and the charge is +2.

| Model         | $\sigma$ , nm | $\epsilon$ , kJ/mol |
|---------------|---------------|---------------------|
| COM           | 0.291320      | 0.40953             |
| IOD           | 0.305497      | 0.36845             |
| HFE           | 0.288116      | 0.19817             |
| Amber19 DEF   | 0.305240      | 1.92376             |
| Charmm36m DEF | 0.243572      | 0.50208             |
| Oplsaa/m DEF  | 0.241203      | 1.88136             |

Table S4. Charmm36m DEF NBFIX parameters for Ca<sup>2+</sup> relevant for this study, Gromacs notation.

| type | type | $\sigma$ , nm  | $\epsilon$ , kJ/mol | Comment                                  |
|------|------|----------------|---------------------|------------------------------------------|
| CAL  | CLA  | 0.332037952251 | 0.561342176000      | Calcium - Chlorine                       |
| CAL  | OC   | 0.287938465703 | 0.502080000000      | Calcium - ASP and GLU side chain oxygens |

Table S5. Multisite dummy metal model parameters. Gromacs notation.

| <b><i>Nonbonded</i></b> | <b>Mass, a.u.</b> | <b>Charge</b>   | <b><math>\sigma</math>, nm</b>     | <b><math>\epsilon</math>, kJ/mol</b> |
|-------------------------|-------------------|-----------------|------------------------------------|--------------------------------------|
| <b>dCa</b>              | 22.08             | -1.0            | 0.2858                             | 0.4323                               |
| <b>d1, d2, d3</b>       | 3.0               | +0.5            | 0.0                                | 0.0                                  |
| <b><i>Bonds</i></b>     | <b>func</b>       | <b>b0, nm</b>   | <b>kb, kJ/mol/nm<sup>2</sup></b>   |                                      |
| dCa-d*                  | 1                 | 0.09            | 669440.0                           |                                      |
| d*-d*                   | 1                 | 0.1273          | 669440.0                           |                                      |
| <b><i>Angles</i></b>    | <b>func</b>       | <b>th0, deg</b> | <b>cth, kJ/mol/rad<sup>2</sup></b> |                                      |
| d1-dCa-d1               | 1                 | 180.0           | 1046.0                             |                                      |
| d2-dCa-d2               | 1                 | 180.0           | 1046.0                             |                                      |
| d3-dCa-d3               | 1                 | 180.0           | 1046.0                             |                                      |
| d1-dCa-d2               | 1                 | 90.0            | 1046.0                             |                                      |
| d1-dCa-d3               | 1                 | 90.0            | 1046.0                             |                                      |
| d2-dCa-d3               | 1                 | 90.0            | 1046.0                             |                                      |
| dCa-d1-d2               | 1                 | 45.0            | 1046.0                             |                                      |
| dCa-d1-d3               | 1                 | 45.0            | 1046.0                             |                                      |
| dCa-d2-d1               | 1                 | 45.0            | 1046.0                             |                                      |
| dCa-d2-d3               | 1                 | 45.0            | 1046.0                             |                                      |
| dCa-d3-d1               | 1                 | 45.0            | 1046.0                             |                                      |
| dCa-d3-d2               | 1                 | 45.0            | 1046.0                             |                                      |
| d1-d2-d1                | 1                 | 90.0            | 1046.0                             |                                      |
| d1-d3-d1                | 1                 | 90.0            | 1046.0                             |                                      |
| d2-d1-d2                | 1                 | 90.0            | 1046.0                             |                                      |
| d2-d3-d2                | 1                 | 90.0            | 1046.0                             |                                      |
| d3-d1-d3                | 1                 | 90.0            | 1046.0                             |                                      |
| d3-d2-d3                | 1                 | 90.0            | 1046.0                             |                                      |
| d1-d2-d3                | 1                 | 60.0            | 1046.0                             |                                      |
| d1-d3-d2                | 1                 | 60.0            | 1046.0                             |                                      |
| d2-d1-d3                | 1                 | 60.0            | 1046.0                             |                                      |

| <i>Dihedrals</i> | func | phase, deg | kd, kJ/mol/rad <sup>2</sup> | pn |
|------------------|------|------------|-----------------------------|----|
| d*-X-X-X         | 9    | 0          | 0                           | 1  |
| X-d*-X-X         | 9    | 0          | 0                           | 1  |
| dCa-X-X-X        | 9    | 0          | 0                           | 1  |
| X-dCa-X-X        | 9    | 0          | 0                           | 1  |

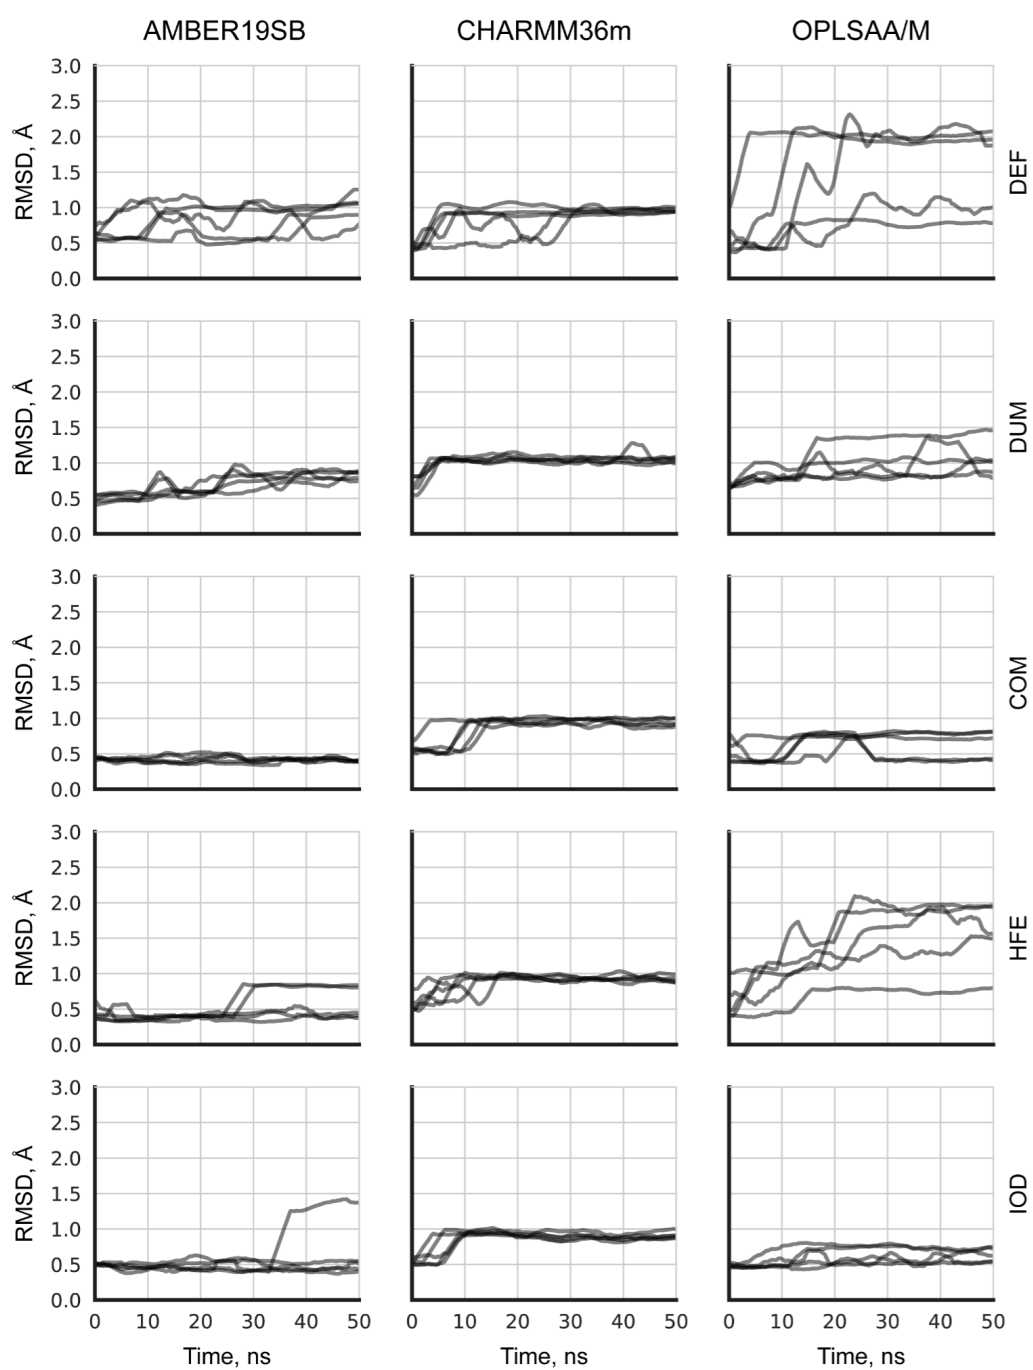

Figure S2. Time evolution of catalytic  $\text{Ca}^{2+}$  site displacements in individual simulations.

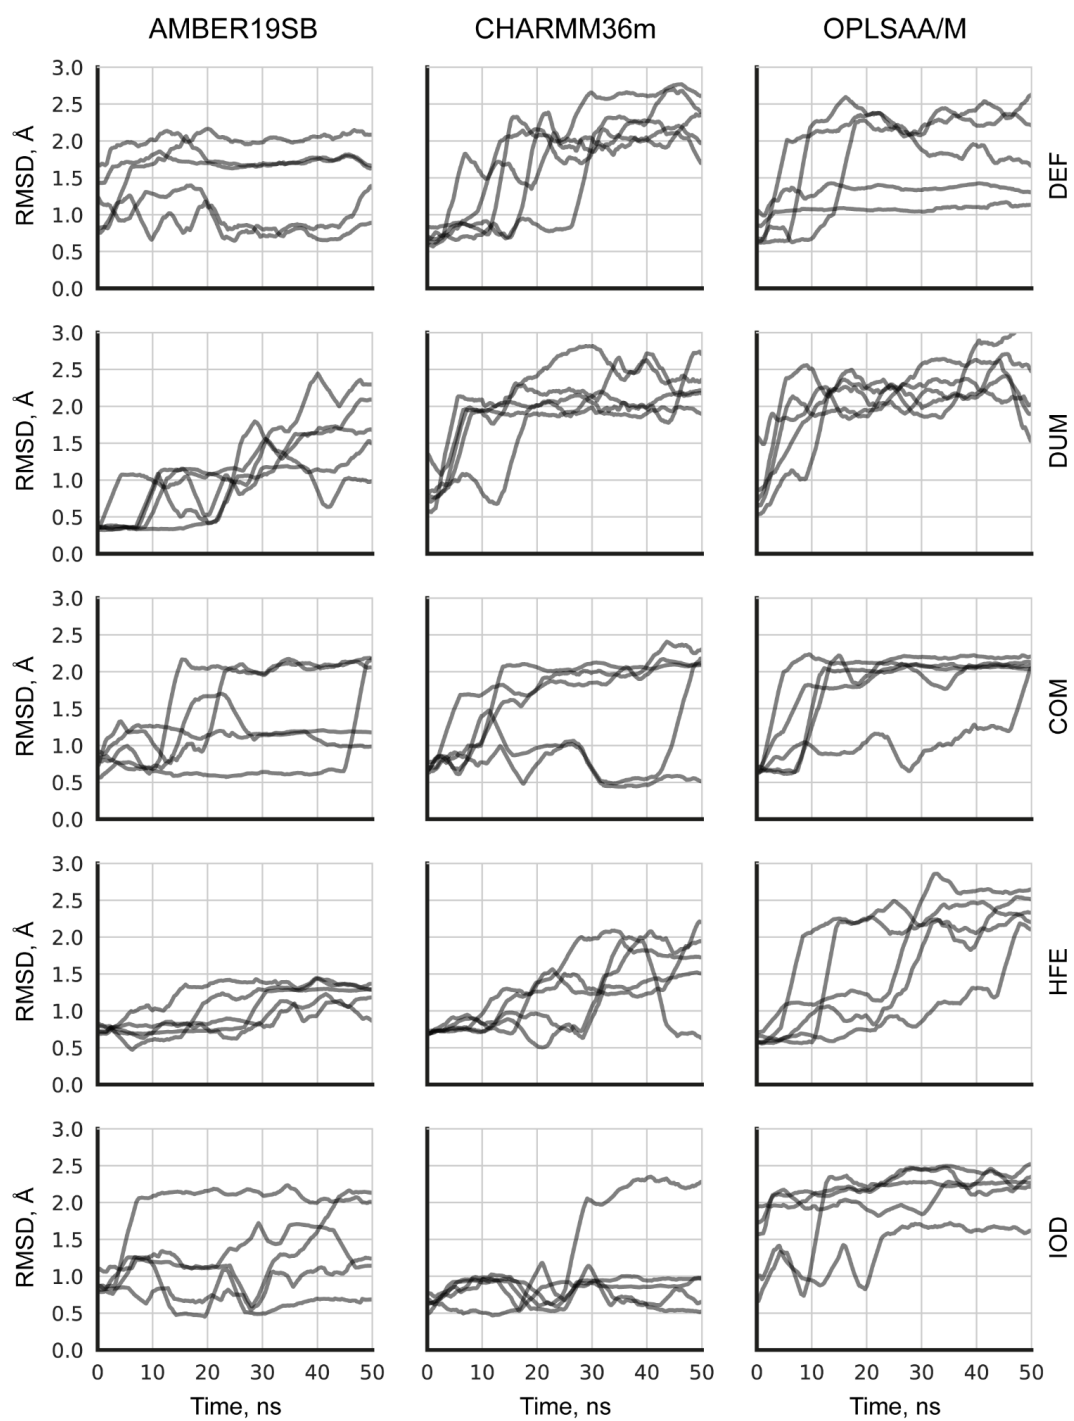

Figure S3. Time evolution of structural  $\text{Ca}^{2+}$  site displacements in individual simulations.

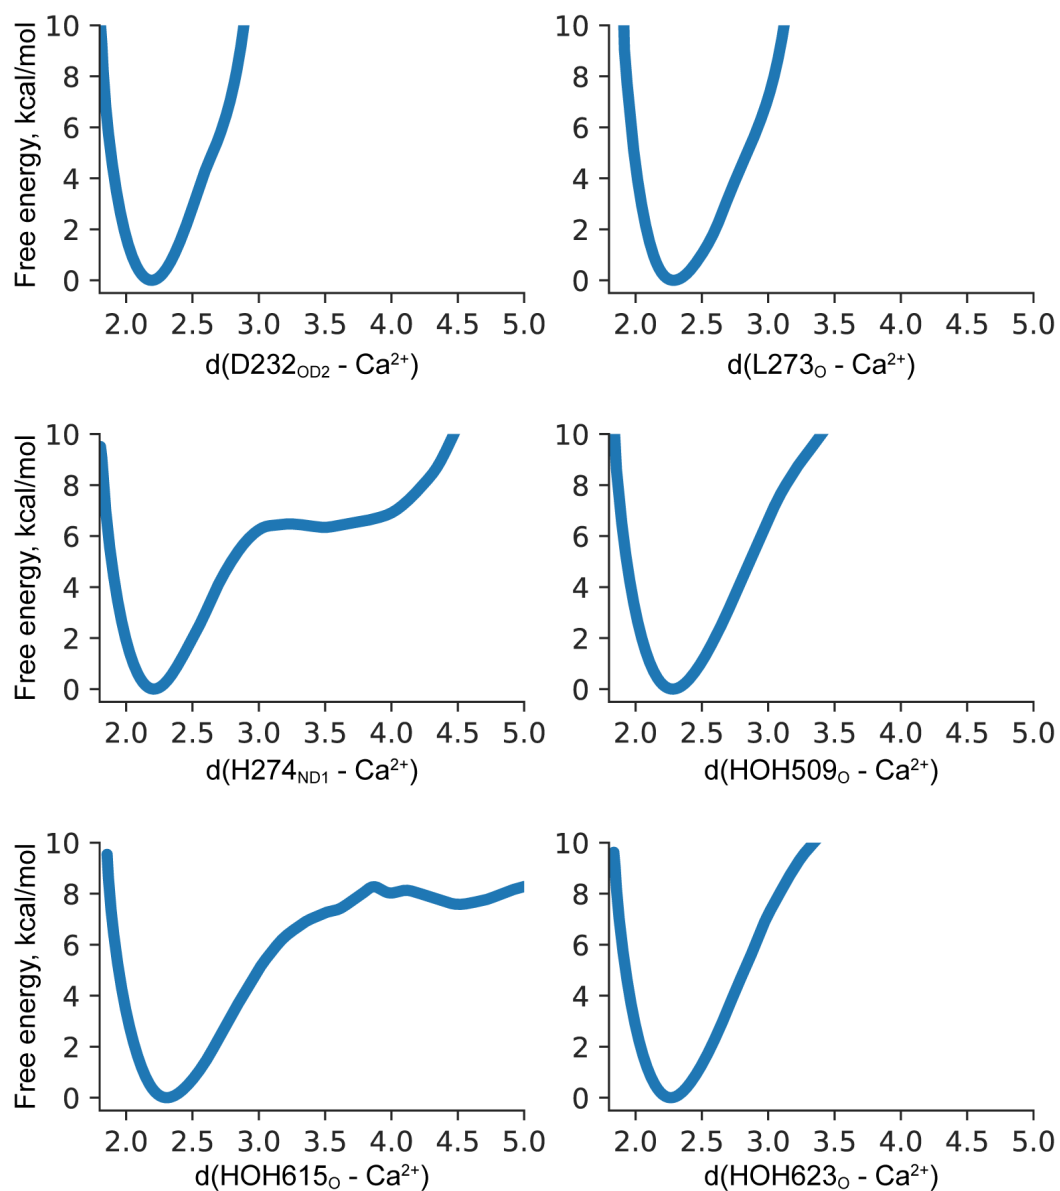

Figure S4. Free energy profiles of interactions between structural  $\text{Ca}^{2+}$  and its coordinators. Water molecule numbering corresponds to PDB ID 3O4P.

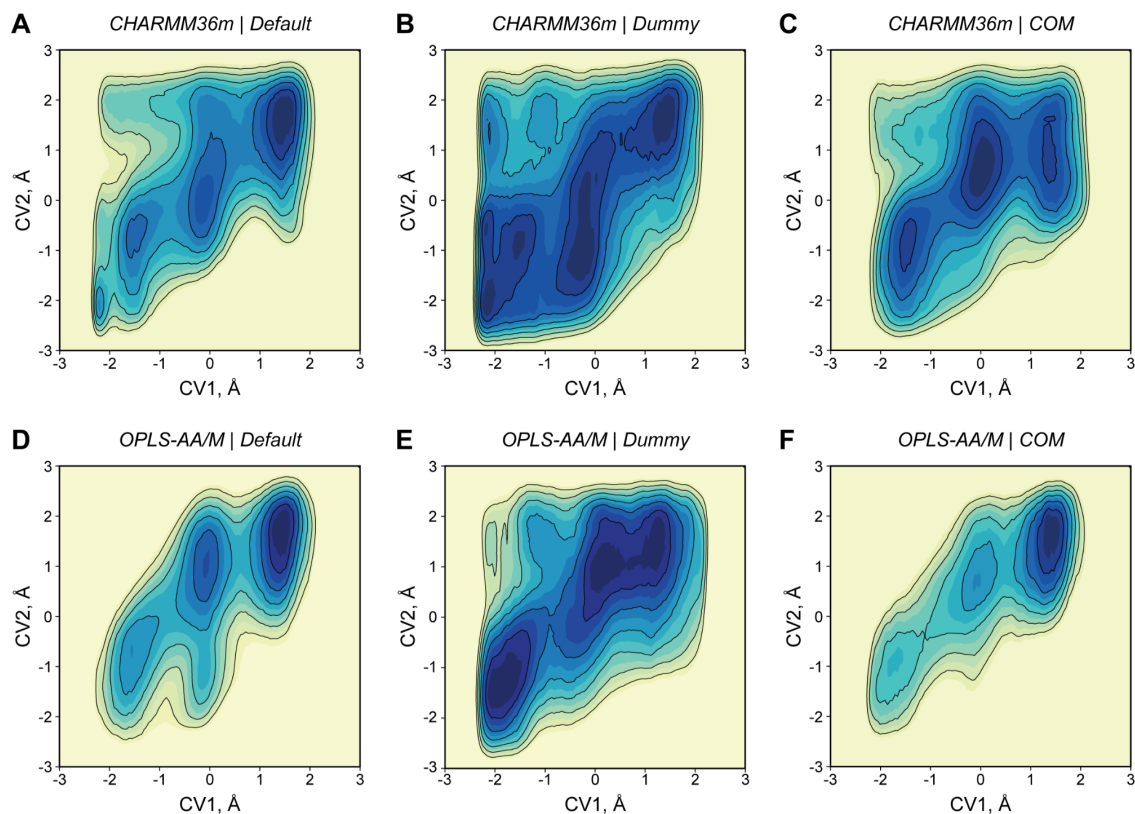

Figure S5. Competition for hydrogen bond with G22 and its influence on E21 conformation in CHARMM36m and OPLS-AA/M simulations. A-C. CHARMM36m parameter combinations. D-F. OPLS-AA/M parameter combinations.

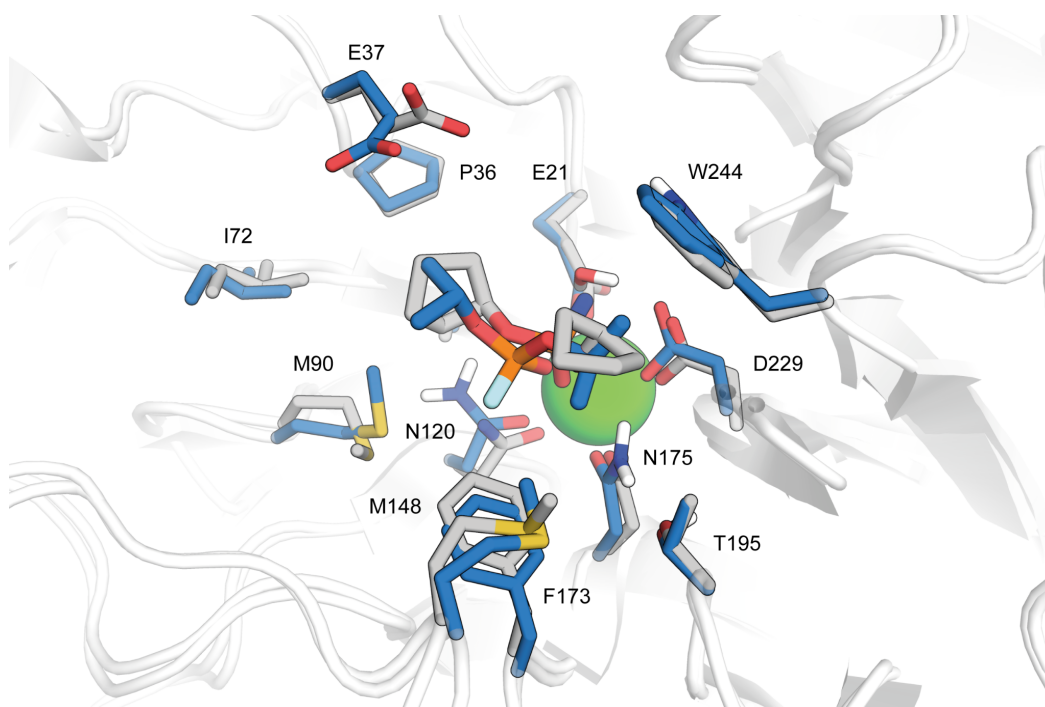

Figure S6. Comparison of ligand binding poses from our study with DFP (blue) and inhibited complex 2GVV (gray).
